# Supplementary material for: Eliminating low-crystalline defects in spent graphite anodes via low-temperature molten salt activation and controlled oxidation
Source: Royal Society of Chemistry journal article supplement (doi:10.1039/d5gc05012j), 2025-12-12
Supplement: d5gc05012j1.pdf [file d5gc05012j1.pdf]

## Supporting Information

### Eliminating Low-Crystalline Defects in Spent Graphite Anodes via Low-Temperature Molten Salt Activation and Controlled Oxidation

Zikun Mai<sup>a,b</sup>, Yuhao Ge<sup>a,b</sup>, Yuan Feng<sup>b</sup>, Kai Luo<sup>b</sup>, Hao Zhang<sup>b</sup>, Meng Huang<sup>\*a,b</sup>, Jiashen Meng<sup>\*b,c,e</sup>,  
Xuanpeng Wang<sup>\*a,c,d,e</sup>

*a. Sanya Science and Education Innovation Park, Wuhan University of Technology, Sanya 572000, China.*

*b. State Key Laboratory of Advanced Technology for Materials Synthesis and Processing, School of Materials Science and Engineering, Wuhan University of Technology, Wuhan 430070, China.*

*c. Hubei Longzhong Laboratory, Wuhan University of Technology (Xiangyang Demonstration Zone), Xiangyang 441000, China.*

*d. Department of Physical Science and Technology, School of Physics and Mechanics, Wuhan University of Technology, Wuhan 430070, China.*

*e. Zhongyu Feima New Material Technology Innovation Center (Zhengzhou) Co., Ltd., Zhengzhou 450001, China.*

*f. Supplementary Information available: [details of any supplementary information available should be included here]. See DOI: 10.1039/x0xx00000x*

**The calculation of lithium-ion diffusion coefficient ( $D_{Li^+}$ ):**

$$I_p = 269000n^{3/2}ACD^{1/2}V^{1/2} \quad (1)$$

$$k = I_p/V^{1/2} \quad (2)$$

$$D_{Li^+} = \left(\frac{k}{269000n^{3/2}AC}\right)^2 \quad (3)$$

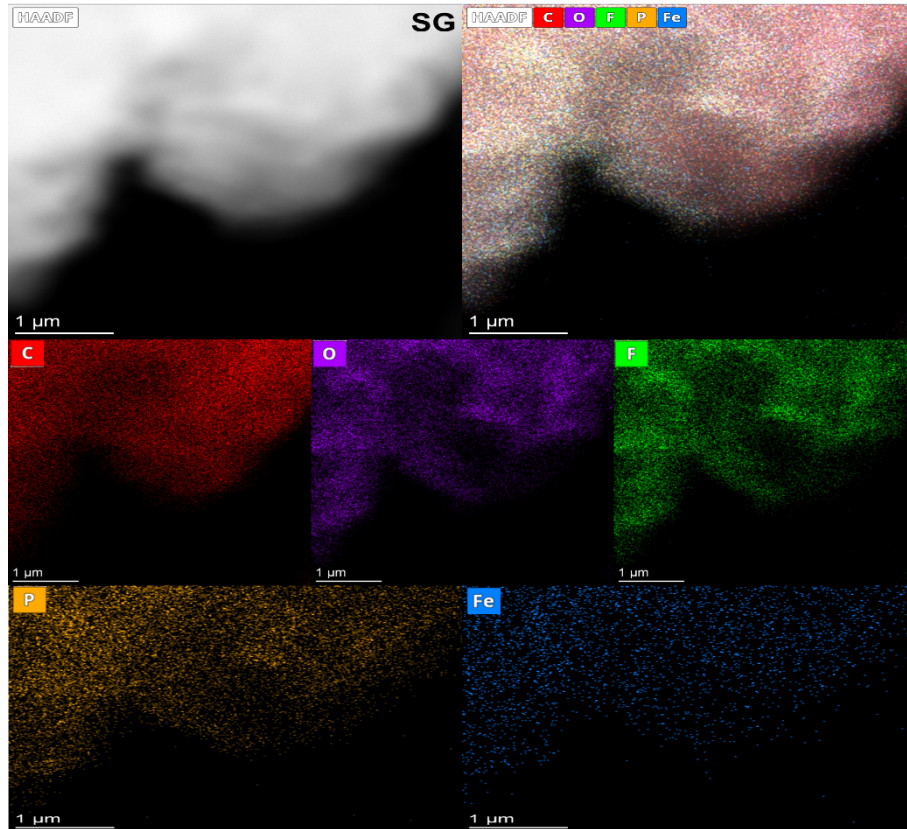

**Fig. S1.** TEM energy spectrum characterization of SG.

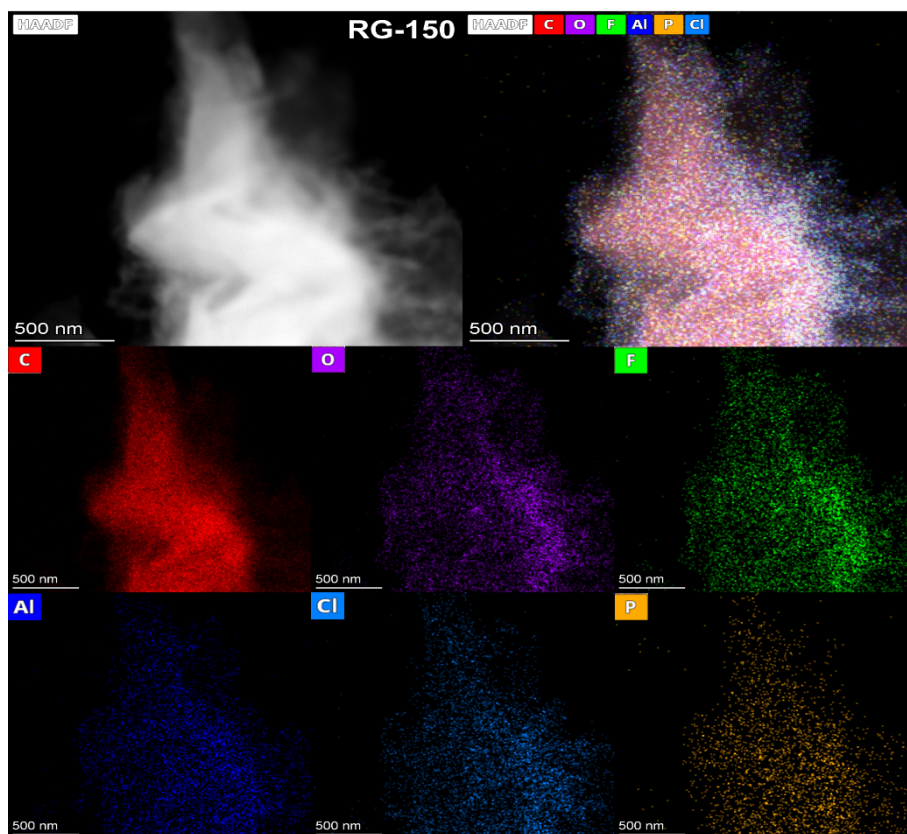

**Fig. S2.** TEM energy spectrum characterization of RG-150.

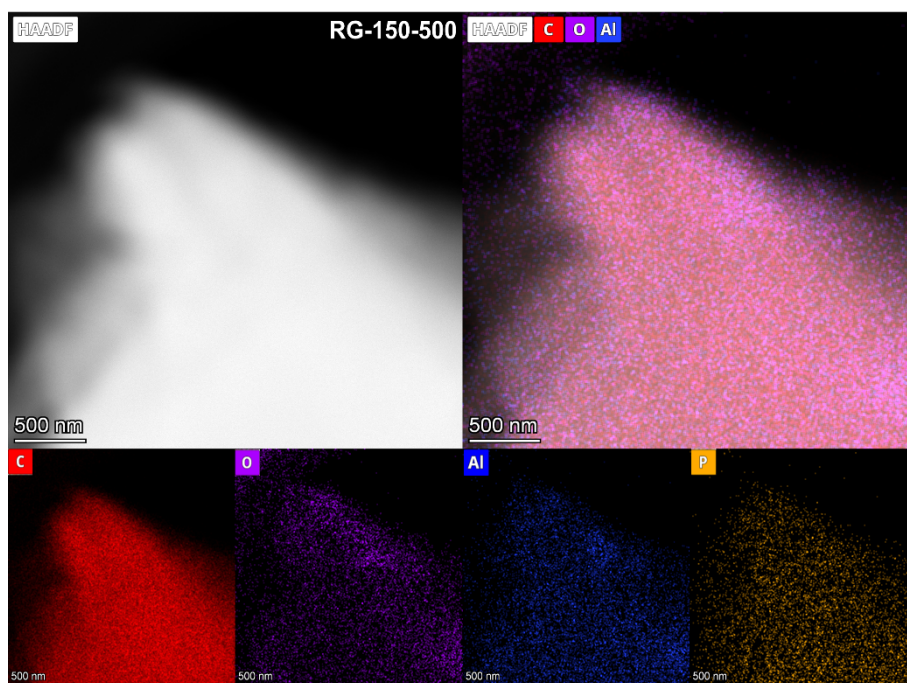

**Fig. S3.** TEM energy spectrum characterization of RG-150-500.

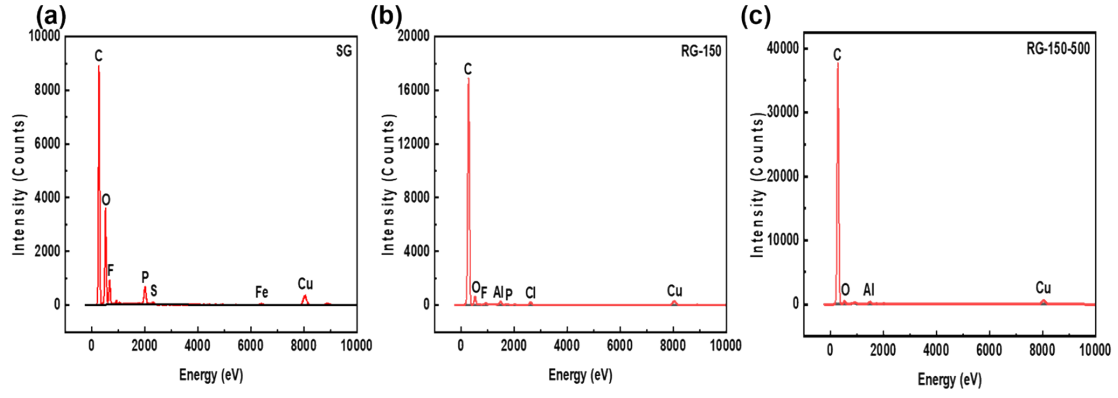

**Fig. S4.** TEM elemental spectrum of (a) SG, (b) RG-150, and (c) RG-150-500.

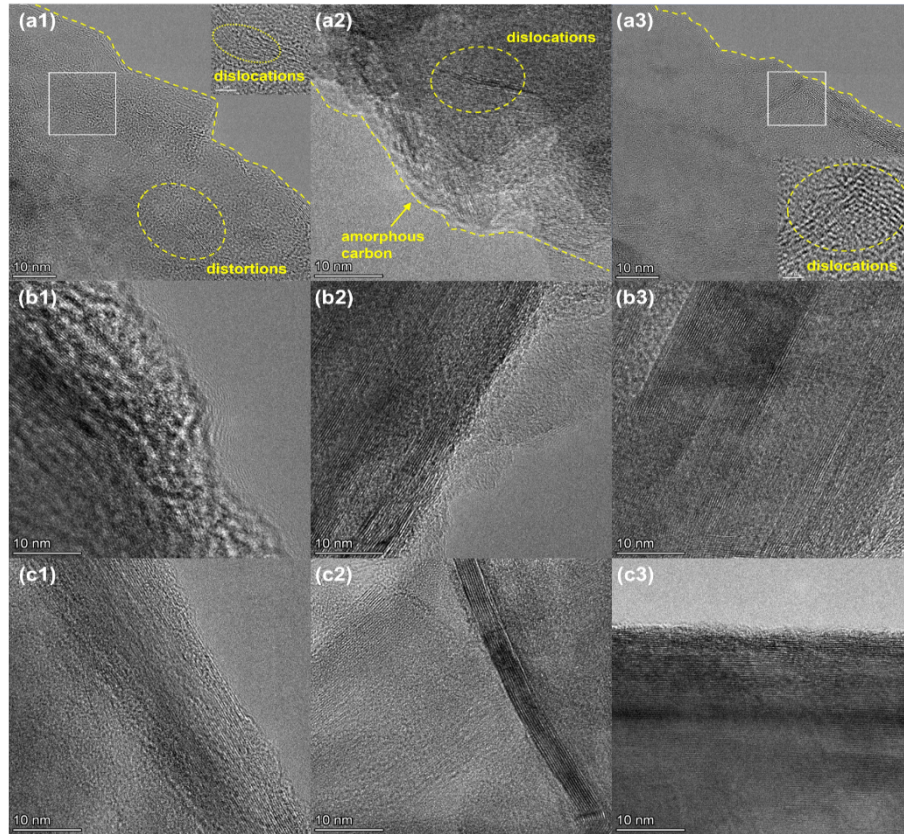

**Fig. S5.** Lattice stripes at different positions of SG (a1-a3), RG-150 (b1-b3), and RG-150-500 (c1-c3).



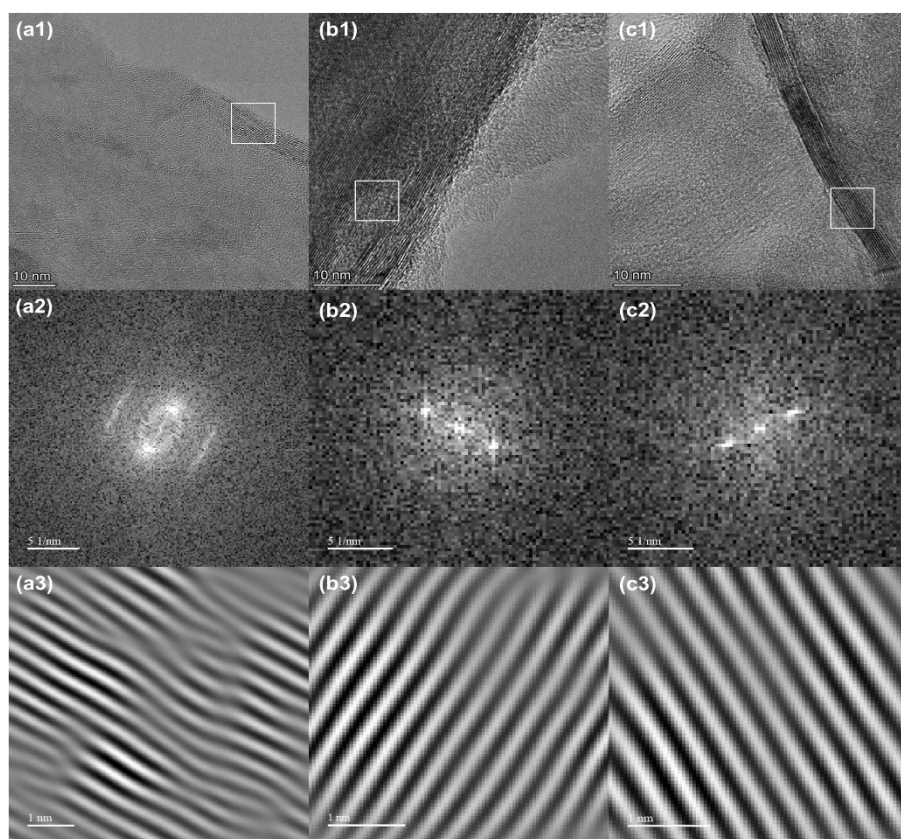

**Fig. S6.** Lattice stripes and FFT of SG (a1-a3), RG-150 (b1-b3), and RG-150-500 (c1-c3).

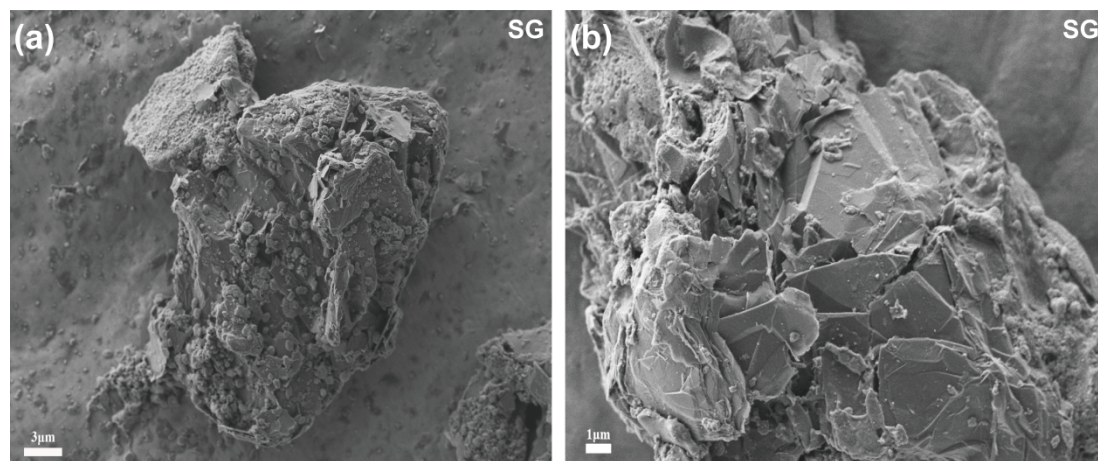

**Fig. S7.** SEM images of SG.

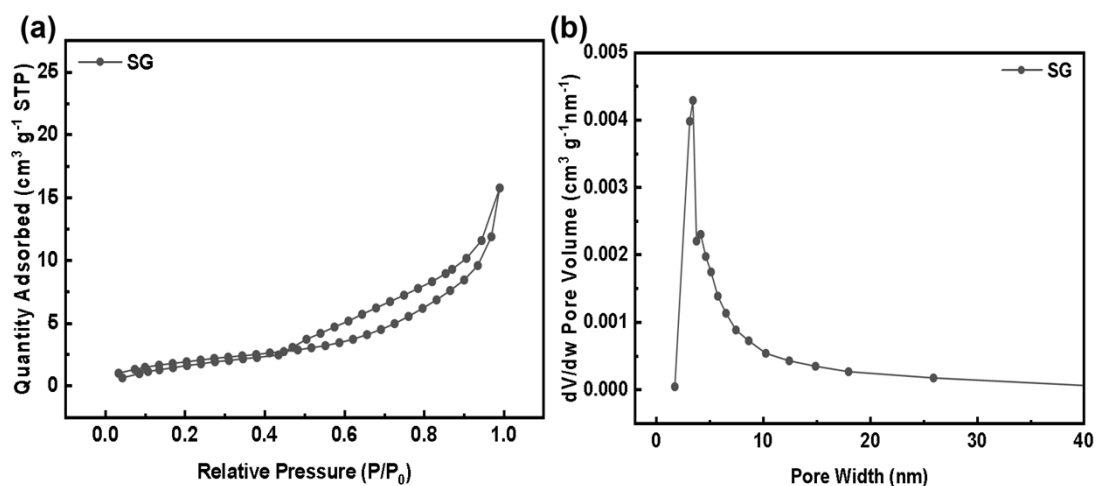

Fig. S8. (a) Nitrogen adsorption-desorption isotherms and (b) pore size distribution of SG.

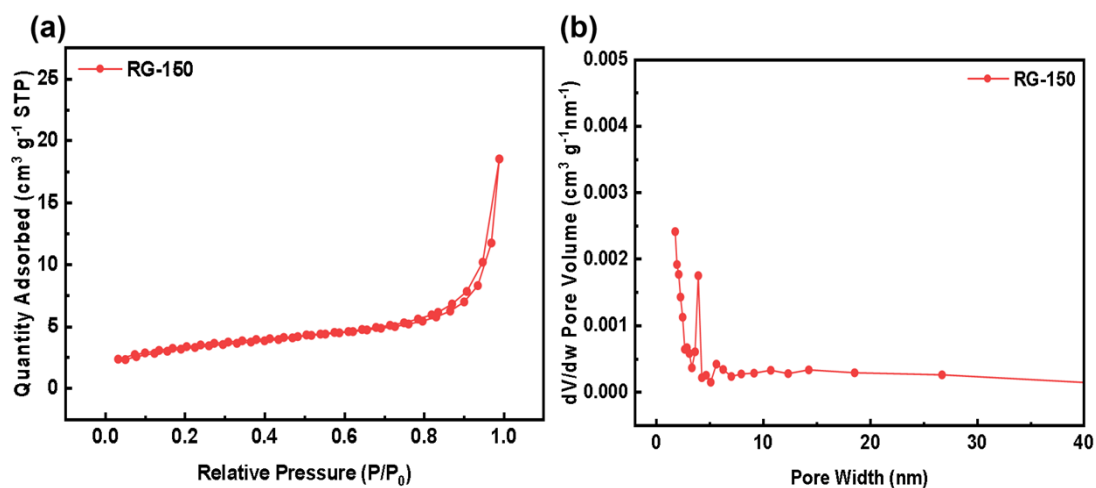

Fig. S9. (a) Nitrogen adsorption-desorption isotherms and (b) pore size distribution of RG-150.

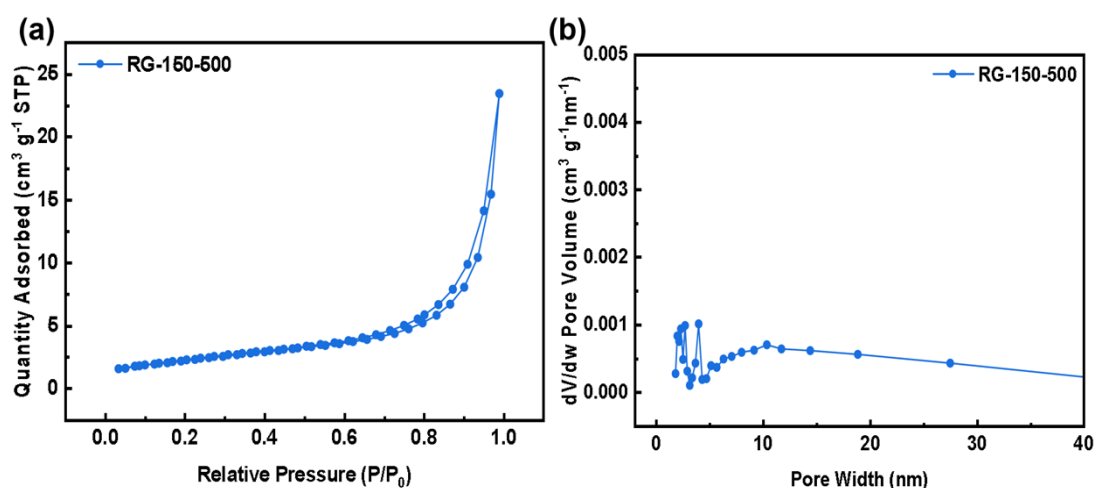

Fig. S10. (a) Nitrogen adsorption-desorption isotherms and (b) pore size distribution of RG-150-500.

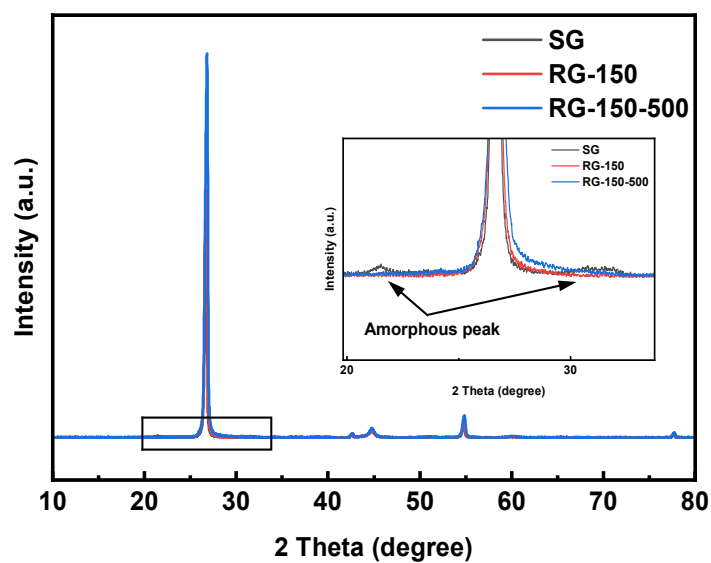

**Fig. S11.** The XRD patterns of SG, RG-150, and RG-150-500 samples.

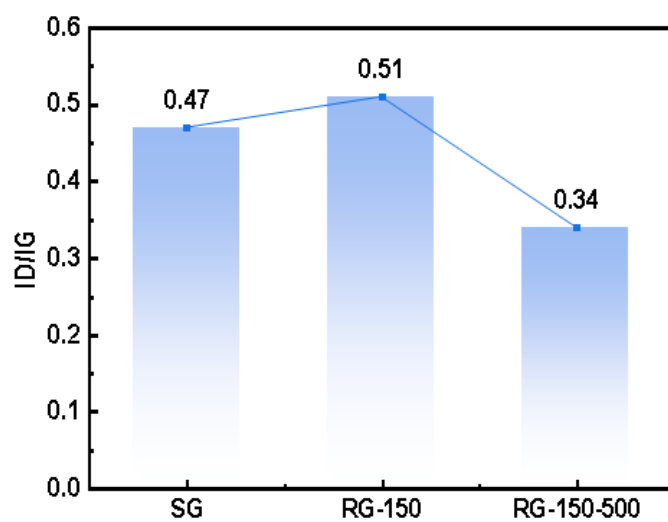

**Fig. S12.** Comparison of  $I_D/I_G$  values for SG, RG-150, and RG-150-500.

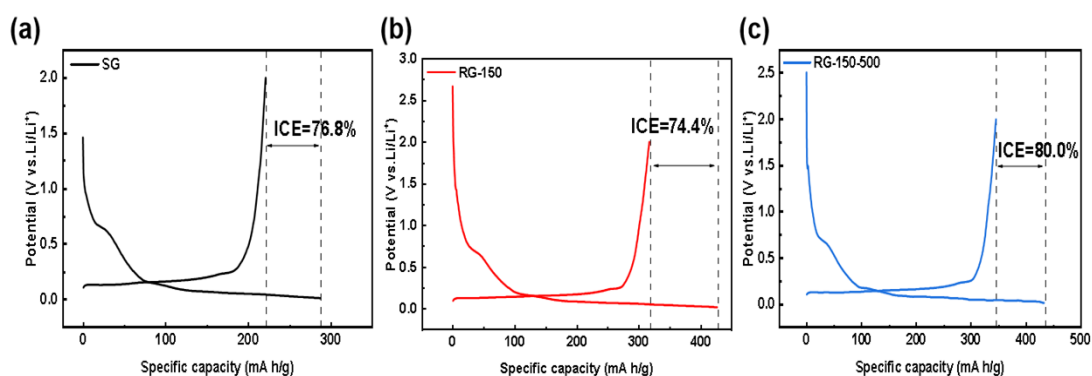

**Fig. S13.** The initial charging/discharging profiles of (a) SG, (b) RG-150, and (c) RG-150-500 at 0.2C.

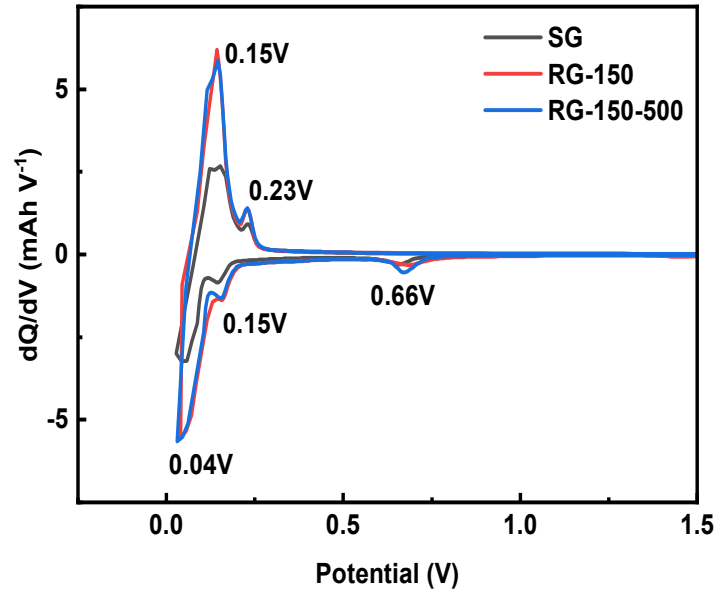

**Fig. S14.** dQ/dV curves of SG, RG-150, and RG-150-500 during first cycle at 0.2C.

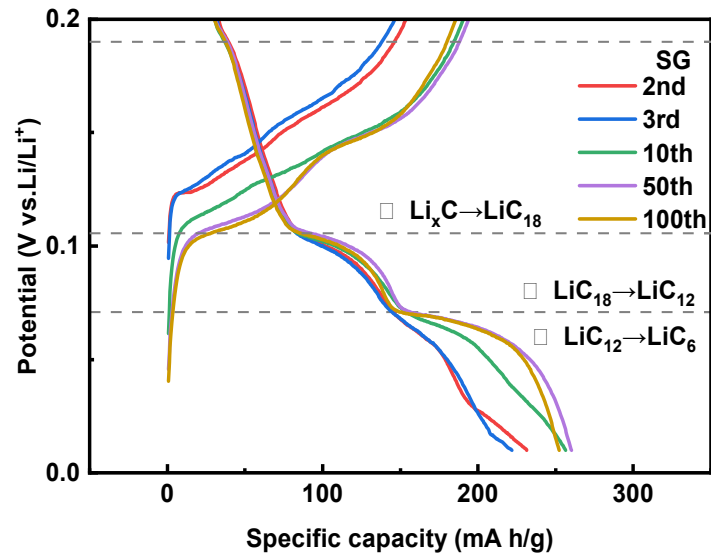

**Fig. S15.** The constant current charge-discharge curve of SG from 0 to 0.2V at 0.2C.

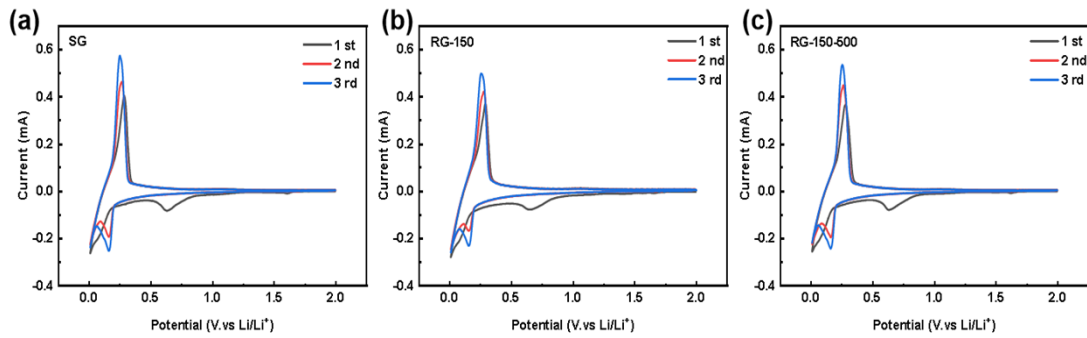

**Fig. S16.** CV curves for the first three cycles of (a) SG, (b) RG-150, and (c) RG-150-500.



**Table S1.** EA test results of SG, RG-150, and RG-150-500.

| Sample     | C (at%) | H (at%) | N (at%) | S (at%) |
|------------|---------|---------|---------|---------|
| SG         | 87.82   | 11.92   | 0.14    | 0.08    |
| RG-150     | 94.27   | 5.55    | 0.13    | 0.05    |
| RG-150-500 | 96.04   | 3.80    | 0.13    | 0.03    |

**Table S2.** ICP-OES test results of SG, RG-150, and RG-150-500.

| Sample     | Li (ppm) | P (ppm) | Fe (ppm) |
|------------|----------|---------|----------|
| SG         | 54.624   | 16.771  | 3.673    |
| RG-150     | 0.409    | 2.774   | 0.780    |
| RG-150-500 | 0.194    | 1.788   | 0.398    |

**Table S3.** Comparison of element content by TEM-EDS.

| Sample     | C (at%) | O (at%) | F (at%) | P (at%) | S (at%) | Fe (at%) | Al (at%) | Cl (at%) | Si (at%) |
|------------|---------|---------|---------|---------|---------|----------|----------|----------|----------|
| SG         | 74.81   | 17.54   | 3.74    | 2.06    | 0.18    | 0.16     | /        | /        | /        |
| RG-150     | 95.99   | 1.97    | 0.16    | 0.04    | 0.02    | /        | 0.51     | 0.40     | 0.09     |
| RG-150-500 | 98.33   | 0.62    | /       | 0.05    | /       | /        | 0.24     | /        | 0.03     |

**Table S4.** BET test for different graphite powders.

| Sample     | Surface area (m <sup>2</sup> /g) | Pore Size (nm) |
|------------|----------------------------------|----------------|
| SG         | 8.82                             | 3.44           |
| RG-150     | 11.44                            | 3.92           |
| RG-150-500 | 8.14                             | 3.96           |

**Table S5.** The positions and intensities of the first five main peaks of SG, RG-150, and RG-150-500 through the PDF method.

|             |                              | SG   | RG-150 | RG-150-500 |
|-------------|------------------------------|------|--------|------------|
| First peak  | Position (Å)                 | 1.44 | 1.44   | 1.44       |
|             | Intensity (Å <sup>-2</sup> ) | 5.97 | 7.33   | 8.46       |
| Second peak | Position (Å)                 | 2.46 | 2.46   | 2.46       |

|            |                                 |      |      |      |
|------------|---------------------------------|------|------|------|
| Third peak | Intensity ( $\text{\AA}^{-2}$ ) | 6.76 | 6.95 | 8.42 |
|            | Position ( $\text{\AA}$ )       | 3.72 | 3.70 | 3.72 |
| Forth peak | Intensity ( $\text{\AA}^{-2}$ ) | 5.25 | 5.68 | 6.45 |
|            | Position ( $\text{\AA}$ )       | 4.26 | 4.20 | 4.26 |
| Fifth peak | Intensity ( $\text{\AA}^{-2}$ ) | 5.27 | 5.58 | 6.60 |
|            | Position ( $\text{\AA}$ )       | 5    | 5    | 5    |
|            | Intensity ( $\text{\AA}^{-2}$ ) | 6.78 | 8.08 | 9.98 |

**Table S6.** Intensity data of Raman by Origin fitting.

| Sample     | I <sub>D</sub> (D-band area) | I <sub>G</sub> (G-band area) | I <sub>D</sub> /I <sub>G</sub> | R <sup>2</sup> |
|------------|------------------------------|------------------------------|--------------------------------|----------------|
| SG         | 3062.4813                    | 6577.7231                    | 0.4656                         | 0.9429         |
| RG-150     | 13225.5790                   | 25972.4602                   | 0.5092                         | 0.9778         |
| RG-150-500 | 11807.4176                   | 34252.6789                   | 0.3447                         | 0.9473         |

**Table S7.** The influence of defects on the electrochemical properties of graphite.

| Sample     | C-F   | C=O   | C-C   | 1C<br>(mAh g <sup>-1</sup> ) | 0.2C<br>(mAh g <sup>-1</sup> ) | ICE (1C) | ICE (0.2C) |
|------------|-------|-------|-------|------------------------------|--------------------------------|----------|------------|
| SG         | 15.3% | 18.6% | 31.7% | 152.5                        | 287.9                          | 64.6%    | 76.8%      |
| RG-150     | 7.8%  | 18.3% | 39.7% | 342.3                        | 426.9                          | 71.3%    | 74.4%      |
| RG-150-500 | 6.9%  | 8.0%  | 50.5% | 399.4                        | 434.2                          | 81.0%    | 80.0%      |

**Table S8.** The influence of graphite purity (TEM-EDS) on electrochemical performance.

| Sample     | C (at%) | 1C<br>(mAh g <sup>-1</sup> ) | After 250<br>cycles | ICE (1C) | 0.2C<br>(mAh g <sup>-1</sup> ) | After 250<br>cycles | ICE (0.2C) |
|------------|---------|------------------------------|---------------------|----------|--------------------------------|---------------------|------------|
| SG         | 74.81   | 152.5                        | 212.2               | 64.6%    | 287.9                          | 232.9               | 76.8%      |
| RG-150     | 95.99   | 342.3                        | 232.0               | 71.3%    | 426.9                          | 259.0               | 74.4%      |
| RG-150-500 | 98.33   | 399.4                        | 316.5               | 81.0%    | 434.2                          | 360.8               | 80.0%      |

**Table S9.** Comparison of electrochemical properties of recycled graphite

| Method                                                           | Performance                                                       | Ref. |
|------------------------------------------------------------------|-------------------------------------------------------------------|------|
| H <sub>2</sub> SO <sub>4</sub> curing-<br>calcination at 1500 °C | The initial charge capacity is 349 mAh g <sup>-1</sup><br>at 0.1C | 1    |

|                                                                                                       |                                                                                                      |          |
|-------------------------------------------------------------------------------------------------------|------------------------------------------------------------------------------------------------------|----------|
| H <sub>2</sub> SO <sub>4</sub> -H <sub>2</sub> O <sub>2</sub> leaching combined with NaOH calcination | discharge capacity of 377.3 mAh g <sup>-1</sup> at 0.1 C, and 359.3 mAh g <sup>-1</sup> at 0.2C      | 2        |
| H <sub>2</sub> SO <sub>4</sub> leaching combined with Co(NO <sub>3</sub> ) <sub>2</sub> catalyze      | Initial discharging capacity of 358 mAh g <sup>-1</sup> at 0.1C                                      | 3        |
| Calcination from 2000 °C to 2800 °C                                                                   | Initial discharging capacity of 346.3 mAh g <sup>-1</sup> at 0.1C                                    | 4        |
| ammonium fluoride roasting and water leaching                                                         | Initial discharging capacity of 340.9 mAh g <sup>-1</sup> at 0.1C                                    | 5        |
| KOH-NaOH composite alkali etching                                                                     | Initial discharging capacity of 320-340 mAh g <sup>-1</sup> at 0.1C                                  | 6        |
| HCl leaching combined with asphalt coating                                                            | discharging capacity of 355 mAh g <sup>-1</sup> at 1C                                                | 7        |
| Reconstruction of layered carbon coating using magnesium catalyst at 900 °C                           | Initial discharging capacity of 398 mAh g <sup>-1</sup> at 0.1C                                      | 8        |
| LTMS-calcination                                                                                      | Initial discharge capacity of 399.4 mAh g <sup>-1</sup> at 1C, and 434.2 mAh g <sup>-1</sup> at 0.2C | Our work |

**Table S10.** Fitting data of pre cycle electrical impedance spectroscopy (EIS) test.

| Sample | SG     | RG-150 | RG-150-500 |
|--------|--------|--------|------------|
| Rs(Ω)  | 8.269  | 7.572  | 7.759      |
| Rct(Ω) | 387.06 | 192.90 | 160.50     |

**Table S11.** Fitting data of electrical impedance spectroscopy (EIS) test after 200 cycles.

| Sample               | SG     | RG-150 | RG-150-500 |
|----------------------|--------|--------|------------|
| Rs(Ω)                | 8.938  | 5.851  | 5.719      |
| Rct(Ω)               | 22.162 | 18.296 | 15.154     |
| R <sub>SEI</sub> (Ω) | 5.709  | 6.777  | 4.923      |

**Table S12.** Total cost of recycled graphite

|                        | Hydrometallurgy | Pyrometallurgy(2000-3000°C) | LTMS-calcination | Data source |
|------------------------|-----------------|-----------------------------|------------------|-------------|
| Materials cost (\$/kg) | 3.753           | 0                           | 0.897            | CB          |

|                     |       |       |       |        |
|---------------------|-------|-------|-------|--------|
| Energy cost (\$/kg) | 4.463 | 9.563 | 6.545 | ISM、BD |
| Total cost (\$/kg)  | 8.216 | 9.563 | 7.442 |        |
| Profit (\$/kg)      | 1.784 | 0.437 | 2.558 |        |

#### Hydrometallurgy:

It was soaked with 5 M sulfuric acid and 35 w/w %  $\text{H}_2\text{O}_2$  at room temperature. The mixture was stirred in a beaker with a mechanical stirrer for 1 hour. Subsequently, the mixture was taken out, and calcination experiments were carried out in a tube furnace. The roasted material was leached in sulfuric acid solution. Then centrifuged, washed, and dried. Finally, the graphite after re-leaching treatment was sintered with NaOH powder at 500 °C for 2 h, washed with DI water, and dried again.

Energy consumption of mechanical agitators:  $0.5 \text{ kW} \times 1 \text{ h} = 0.5 \text{ kW h}$

Energy consumption of tube furnace:  $6 \text{ kW} \times 4 \text{ h} + 6 \text{ kW} \times 2 \text{ h} = 36 \text{ kW h}$

Energy consumption of the drying oven:  $1 \text{ kW} \times 8 \text{ h} + 1 \text{ kW} \times 8 \text{ h} = 16 \text{ kW h}$

Total energy cost:  $(0.5+36+16) \text{ kW h} \times \$ 0.085 \text{ kWh}^{-1} \approx \$ 4.4625$

CB: <https://www.chemicalbook.com/>. ISM: <https://www.instrument.com.cn>

BD: <https://www.baidu.com/>

#### Pyrometallurgy:

The obtained spent graphite samples (SG) were heat-treated in a tube furnace at 500 °C for 4 hours, and impurities were removed by washing and drying. The SG was then ground using a planetary ball mill until it passed a 400 mesh sieve. The samples were placed in a tube furnace for the heat treatment process under an Ar atmosphere. The samples were individually heated to 2800 °C, kept at that temperature for 12 h, and cooled to room temperature to obtain regenerated graphite (RG).

Energy consumption of tube furnace :  $6 \text{ kW} \times 4 \text{ h} + 6 \text{ kW} \times 12 \text{ h} = 96 \text{ kW h}$

Energy consumption of the drying oven:  $1 \text{ kW} \times 12 \text{ h} = 12 \text{ kW h}$

Energy consumption of ball mill:  $0.75 \text{ kW} \times 6 \text{ h} = 4.5 \text{ kW h}$

Total energy cost:  $(96+12+4.5) \text{ kW h} \times \$ 0.085 \text{ kWh}^{-1} \approx \$ 9.5625$

#### LTMS-calcination:

Muffle Furnace Energy Consumption:  $2.5 \text{ kW} \times 24 \text{ h} + 2.5 \text{ kW} \times 2 \text{ h} = 65 \text{ kW h}$

Energy consumption of the drying oven:  $1 \text{ kW} \times 12 \text{ h} = 12 \text{ kW h}$

Total energy cost:  $(65+12) \text{ kW h} \times \$ 0.085 \text{ kWh}^{-1} \approx \$ 6.545$

## References

1. Y. Gao, C. Wang, J. Zhang, Q. Jing, B. Ma, Y. Chen and W. Zhang, *ACS Sustainable Chemistry & Engineering*, 2020, **8**, 9447-9455.
2. X. Ma, M. Chen, B. Chen, Z. Meng and Y. Wang, *ACS Sustainable Chemistry & Engineering*, 2019, **7**, 19732-19738.
3. Q. Chen, L. Huang, J. Liu, Y. Luo and Y. Chen, *Carbon*, 2022, **189**, 293-304.
4. G.-Q. Yu, M.-Z. Xie, Z.-H. Zheng, Z.-G. Wu, H.-L. Zhao and F.-Q. Liu, *Resources, Conservation and Recycling*, 2023, **199**, 107267.
5. X. Zhu, J. Xiao, Q. Mao, Z. Zhang, Z. You, L. Tang and Q. Zhong, *Chemical Engineering Journal*, 2022, **430**, 132703.
6. H. Da, M. Gan, D. Jiang, C. Xing, Z. Zhang, L. Fei, Y. Cai, H. Zhang and S. Zhang, *ACS Sustainable Chemistry & Engineering*, 2021, **9**, 16192-16202.
7. K. Chen, Y. Ding, L. Yang, Z. Wang, H. Yu, D. Fang, Y. Feng, L. Hu, C. Xu, P. Shao, X. Luo and L. Chen, *Resources, Conservation and Recycling*, 2024, **201**, 107326.
8. S. Luo, F. Liu, W. Tianxu, Y. Liu, C. Zhang, C. Bie, M. Liu, P. K. Chu, K. Huo and B. Gao, *Energy Storage Materials*, 2024, **73**, 103833.
